# Supplementary material for: The Role of the Tumor Microenvironment in Neuropilin 1-Induced Radiation Resistance in Lung Cancer Cells
Source: PubMed Central journal article supplement (PMC6692609; doi:10.7150/jca.28163), 2019-07-08
Supplement: jcav10p4017s1.pdf [file jcav10p4017s1.pdf]

**Supplementary Table 1. Primer for quantitative Real-time PCR**

| <b>Primer name</b>             | <b>Sequence(5'-3')</b>  | <b>Sequence(3'-5')</b>   |
|--------------------------------|-------------------------|--------------------------|
| <b>GAPDH</b>                   | ACATCGCTCAGACACCATG     | TGTAGTTGAGGTCAATGAAGGG   |
| <b>NRP1</b>                    | CCCCAAACCACTGATAACTCG   | AGACACCATAACCAACATTCC    |
| <b><math>\alpha</math>-SMA</b> | TGGTGGGAATGGGACAAAA     | CGTGAGCAGGGTGGGATG       |
| <b>TGF-<math>\beta</math></b>  | TGGTGGAAACCCACAACGAA    | AGAAGTTGGCATGGTAGCCC     |
| <b>Smad2</b>                   | ATGTCGTCCATCTTGCCATTC   | AACCGTCCTGTTTTCTTTAGCTT  |
| <b>Smad3</b>                   | CACGCAGAACGTGAACACC     | GGCAGTAGATAACGTGAGGGA    |
| <b>Smad7</b>                   | TCCTGCTGTGCAAAGTGTC     | TTGTTGTCCGAATTGAGCTG     |
| <b>IL-17A</b>                  | AACCGATCCACCTCACCTTG    | TCTCTTGCTGGATGGGGACA     |
| <b>IL-8</b>                    | ACTCCAAACCTTTCCACCCC    | ATGAATTCTCAGCCCTCTTCAAA  |
| <b>IL-6</b>                    | ACTCACCTCTTCAGAACGAATTG | CCATCTTTGGAAGGTTTCAGGTTG |
| <b>E-cadherin</b>              | CAGGTCTCCTCATGGCTTTGC   | CTTCCGAAAAGAAGGCTGTCC    |
| <b>N-cadherin</b>              | AGCGCAGTCTTACCGAAGG     | TCGCTGCTTTCATACTGAACTTT  |
| <b>vimentin</b>                | CGTCCACACGCACCTACAG     | GGGGGATGAGGAATAGAGGCT    |
